# Supplementary material for: CRISPR-SKIP: programmable gene splicing with single base editors
Source: PubMed Central journal article supplement (PMC6092781; doi:10.1186/s13059-018-1482-5), 2018-08-15
Supplement: 13059_2018_1482_MOESM1_ESM.pdf [file 13059_2018_1482_MOESM1_ESM.pdf]

| Target Gene | Target Exon Number | Ensembl ID: Exon Number | BE3 Version | Target Sequence      | PAM    | Exon Skipped?<br>(by gel electrophoresis) |
|-------------|--------------------|-------------------------|-------------|----------------------|--------|-------------------------------------------|
| BRCA2       | 10                 | ENST00000380152.7:10    | SpBE3       | AATCCTGTTAAAGTATAAAA | CAG    | Y                                         |
| BRCA2       | 17                 | ENST00000380152.7:17    | SpBE3       | GAGCCCTGAACAAATAAAAG | TAG    | N                                         |
| BRCA2       | 17                 | ENST00000380152.7:17    | SaBE3-KKH   | GAGCCCTGAACAAATAAAAG | TAGAAT | N                                         |
| BRCA2       | 26                 | ENST00000380152.7:26    | SpBE3-VQR   | AATATTCTAAGAAAATAAGT | GGA    | Y                                         |
| CCNB1       | 5                  | ENST00000256442.9:5     | SaBE3-KKH   | CTCTTCTGCAAAAGAAAAT  | GCTGAT | N                                         |
| CCNB1       | 6                  | ENST00000256442.9:6     | SaBE3-KKH   | AATTATTCTGCAATGGGAAT | TTCAAT | N                                         |
| EGFR        | 23                 | ENST00000275493.6:23    | SpBE3-VQR   | ACCCCTGAGAGGATGAAGCA | AGA    | N                                         |
| IL1RAP      | 10                 | ENST00000447382.5:10    | SpBE3-VQR   | GGCACTGGAATGAACAACAA | AGA    | Y                                         |
| IL1RAP      | 10                 | ENST00000447382.5:10    | SpBE3       | TGGCACTGGAATGAACAACA | AAG    | N                                         |
| JAG1        | 9                  | ENST00000254958.9:9     | SpBE3       | AATGCTGGTCAACAAGAAA  | AGG    | Y                                         |
| JAG1        | 12                 | ENST00000254958.9:12    | SpBE3       | AAATCCTAGAAGAGGAGAAG | GGG    | N                                         |
| LMNA        | 11                 | ENST00000448611.6:11    | SpBE3       | GAGCCCTGGGAAGGGAGACA | AGG    | N                                         |
| PI4KA       | 9                  | ENST00000255882.10:9    | SpBE3-VQR   | TCTCACCTACCAAGGAAAC  | AGA    | N                                         |
| PIK3CA      | 5                  | ENST00000263967.3:5     | SpBE3       | TATACTGTAAGAGATTAAGG | GGG    | Y                                         |
| PIK3CA      | 11                 | ENST00000263967.3:11    | SaBE3-KKH   | TAGTGTCTGTGTGGGAGAAA | CAAAAT | Y                                         |
| PIK3CA      | 12                 | ENST00000263967.3:12    | SaBE3-KKH   | ATACATCTGTGTATGAGAAA | GACAAT | Y                                         |
| RELA        | 6                  | ENST00000406246.7:6     | SpBE3-VQR   | GGAACTGCCAAGAAAACAGG | CGA    | N                                         |
| RELA        | 7                  | ENST00000406246.7:7     | SpBE3       | ACCTGAGGCAGTGAAAACAA | GGG    | Y                                         |
| RELA        | 10                 | ENST00000406246.7:10    | SaBE3-KKH   | TGGGTCCTGTAGGGCAAGGG | CTAGGT | Y                                         |
| SCARB1      | 5                  | ENST00000339570.9:5     | SpBE3       | GTTGAGCTACAGACACAGCA | GGG    | Y                                         |

**Table S1.** Results of CRISPR-SKIP targeting at 18 human sites with 20 sgRNAs. Target base is shown in red.

| Designation     | Target Gene | Target Exon  | Primer Sequence          | RT PCR or |
|-----------------|-------------|--------------|--------------------------|-----------|
| BRCA2int9 F     | BRCA2       | 10           | AACAGGAGAAGGGGTGACTGAC   | gDNA      |
| BRCA2ex10 R     | BRCA2       | 10           | TTCCAATGTGGTCTTTGCAGCT   | gDNA      |
| BRCA2ex7 F      | BRCA2       | 10           | GCTACACCACCCACCCCTTAGTT  | RT        |
| BRCA2ex11 R     | BRCA2       | 10           | TTCTGTCAGGCATGACAGAGAA   | RT        |
| BRCA2int16 F    | BRCA2       | 17           | agatgtgggggtctcactatgttg | gDNA      |
| BRCA2ex17 R     | BRCA2       | 17           | AGCTGCCAGTTTCCATATGATCCA | gDNA      |
| BRCA2ex15 F     | BRCA2       | 17           | CACAGCCAGGCAGTCTGTATCT   | RT        |
| BRCA2ex18 R     | BRCA2       | 17           | TGGGGCTTCAAGAGGTGTACAG   | RT        |
| BRCA2int25 F    | BRCA2       | 26           | aggacttgagcccaatcttcc    | gDNA      |
| BRCA2ex26 R     | BRCA2       | 26           | GTGTACGGCCCTGAAGTACAGT   | gDNA      |
| BRCA2ex25 F     | BRCA2       | 26           | TCTGCTAGTCCAAAAGAGGGCC   | RT        |
| BRCA2ex27 R     | BRCA2       | 26           | CTGTGCAGCCGGAGAAACAAAT   | RT        |
| CCNB1int4 F     | CCNB1       | 5            | aagcaatctgccaacttcagcc   | gDNA      |
| CCNB1ex5 R      | CCNB1       | 5            | CAGTGACTTCCCAGCCAGTAG    | gDNA      |
| CCNB1int5 F     | CCNB1       | 6            | CCCTTCCAGGATTCTAGCCGAG   | gDNA      |
| CCNB1ex6 R      | CCNB1       | 6            | AAACATGGCAGTGACACCAACC   | gDNA      |
| CCNB1ex3 F      | CCNB1       | 5 and 6      | gagccagaacctgagccTGTTA   | RT        |
| CCNB1ex7 R      | CCNB1       | 5 and 6      | AGGAGGAAAGTGCACCATGTCA   | RT        |
| EGFRint22 F     | EGFR        | 23           | gaggtagactgaggcttccagc   | gDNA      |
| EGFRint23 R     | EGFR        | 23           | GATGCAAAGGCCTCAGCTGTTT   | gDNA      |
| EGFRex20 F      | EGFR        | 23           | GCTCAACTGGTGTGTGCAGATC   | RT        |
| EGFRex24 R      | EGFR        | 23           | TCACGGAACTTTGGGCGACTAT   | RT        |
| IL1RAPint9 F    | IL1RAP      | 10           | accgtggacttcttcaggtagc   | gDNA      |
| IL1RAPex10 R    | IL1RAP      | 10           | GCTCCAAAACCACAAGCCAGTT   | gDNA      |
| IL1RAPex8 F     | IL1RAP      | 10           | CTCGCAATGAGGTTTGGTGGAC   | RT        |
| IL1RAPex11.12 R | IL1RAP      | 10           | GTATTTCCTCCAGGCAGACTGT   | RT        |
| JAG1int8 F      | JAG1        | 9            | CTTGTAGCAGGTGTCTGGCTCT   | gDNA      |
| JAG1ex9 R       | JAG1        | 9            | GGGGCACACACACTTAAATCCG   | gDNA      |
| JAG1ex8 F       | JAG1        | 9            | GAGGCAGCTGTAAGGAGACCTC   | RT        |
| JAG1ex12 R      | JAG1        | 9            | CTGCATAGCCAGGTGGACAGAT   | RT        |
| JAG1ex7 F       | JAG1        | 9 long range | GAAC TTGTAGCAACACAGGCC   | RT        |
| JAG1ex15 R      | JAG1        | 9 long range | AGGAGTTGACACCATCGATGCA   | RT        |
| JAG1int11 F     | JAG1        | 12           | AGCTAAACC CGAACAGTCATGC  | gDNA      |
| JAG1int12 R     | JAG1        | 12           | CCATCTGAGGTTTGGCCACCAC   | gDNA      |
| JAG1ex9 F       | JAG1        | 12           | CGGATTTAAGTGTGTGTGCCCC   | RT        |
| JAG1ex13 R      | JAG1        | 12           | TTCTGGCAGGGATTAGGCTCAC   | RT        |
| LMNAint10 F     | LMNA        | 11           | AAGCTTGCTCCCGTTCTCTCTT   | gDNA      |
| LMNAint11 R     | LMNA        | 11           | CAGAAGAGCCAGAGGATGGG     | gDNA      |
| LMNAex10 F      | LMNA        | 11           | GACGACGAGGATGAGGATGGAG   | RT        |
| LMNAex12 R      | LMNA        | 11           | CACCCCTTTCCTTGGCTTCTA    | RT        |
| PI4KAint8 F     | PI4KA       | 9            | CTGAGGTCTGCACATCCTGGAA   | gDNA      |
| PI4KAint9 R     | PI4KA       | 9            | CACTGCAAAACCCCTTCCACTC   | gDNA      |
| PI4KAex8 F      | PI4KA       | 9            | ACTGCCCTAGAGCCTGAGTACT   | RT        |
| PI4KAex10 R     | PI4KA       | 9            | CACGCAGCATCTGAACATGGT    | RT        |

|                     |          |                               |                           |      |
|---------------------|----------|-------------------------------|---------------------------|------|
| PI4KAex31 F         | PI4KA    | 33                            | CCATGTTCAAGCTGACCGCAAT    | RT   |
| PI4KAex36 R         | PI4KA    | 33                            | GCTGGCGGTCAGGTACTTCTTA    | RT   |
| PIK3CAint4 F        | PIK3CA   | 5                             | ggggtttcaccgttttagccag    | gDNA |
| PIK3CAex5 R         | PIK3CA   | 5                             | ACATCAAATGGGCATCCTCCC     | gDNA |
| PIK3CAex3 F         | PIK3CA   | 5                             | TCTTACCAGAATTGCCAAAGC     | RT   |
| PIK3CAex6 R         | PIK3CA   | 5                             | TCCACCTGGGATTGGAACAAGG    | RT   |
| PIK3CAex2 F         | PIK3CA   | 5 long range                  | ACCAGTAGGCAACCGTGAAGAA    | RT   |
| PIK3CAex9 R         | PIK3CA   | 5 long range                  | TCGGATACAGACCAATGGCA      | RT   |
| PIK3CAex9 F         | PIK3CA   | 11 and 12                     | TAGCTATTTCCACGCAGGACTG    | RT   |
| PIK3CAex14 R        | PIK3CA   | 11 and 12                     | TTCCATTGCCTCGACTTGCCTA    | RT   |
| RELAint5 F          | RELA     | 6                             | TTTCTGCATCTCCCTCACTGG     | gDNA |
| RELAex6 R           | RELA     | 6                             | ACAGCATTAGGTCGTAGTCCC     | gDNA |
| RELAint6 F          | RELA     | 7                             | CAGATTGGCaccactggacta     | gDNA |
| RELAex7 R           | RELA     | 7                             | AGATCTTGAGCTCGGCAGTGTT    | gDNA |
| RELAex8 R           | RELA     | 6 and 7                       | CCTGGTCCCGTGAATACACCT     | RT   |
| RELAex4 F           | RELA     | 6 and 7, and 7 long           | CCCACGAGCTTGTAGGAAGGA     | RT   |
| RELAex11 R          | RELA     | 7 long range                  | TGCTCAGGGATGACGTAAGGG     | RT   |
| RELAint8 F          | RELA     | 10                            | CAACAGAGGCCCTCCAAAAGCTG   | gDNA |
| RELAex10 R          | RELA     | 10                            | AATCCTTACCTGGCTTGGGGAC    | gDNA |
| RELAex7 F           | RELA     | 10                            | AACACTGCCGAGCTCAAGATCT    | RT   |
| RELAex11 R          | RELA     | 10                            | TGCTCAGGGATGACGTAAGGG     | RT   |
| SCARB1int4 F        | SCARB1   | 5                             | ggaggaagccagaCTCTCCTG     | gDNA |
| SCARB1int5 R        | SCARB1   | 5                             | AGAGTGTTTCATCCTCCCAGCAC   | gDNA |
| SCARB1ex4 F         | SCARB1   | 5                             | ACTGTGGGTGAGATCATGTGGG    | RT   |
| SCARB1ex7 R         | SCARB1   | 5                             | TTCGTTGGGTGGGTAGATGGAC    | RT   |
| BRCA2ex10off1F      | BRCA2 OT | exon 10 OT1                   | GCTGCCTACTCTGCCTACTCAG    | gDNA |
| BRCA2ex10off1R      | BRCA2 OT | exon 10 OT1                   | gtccataggcctcaccagactg    | gDNA |
| BRCA2ex10off2F      | BRCA2 OT | exon 10 OT2                   | TTCTGAAGGAAGACGCCCTGGAG   | gDNA |
| BRCA2ex10off2R      | BRCA2 OT | exon 10 OT2                   | gctgcaataaacatgggtgtgc    | gDNA |
| BRCA2ex10off3F      | BRCA2 OT | exon 10 OT3                   | AATTCCTGGCATTAGGTTGAGC    | gDNA |
| BRCA2ex10off3R      | BRCA2 OT | exon 10 OT3                   | GCAGAATGCAGACTTTCCCTTTCA  | gDNA |
| BRCA2ex10off4F      | BRCA2 OT | exon 10 OT4                   | ggtgcctatcCCTGCCTTGAT     | gDNA |
| BRCA2ex10off4R      | BRCA2 OT | exon 10 OT4                   | TTTTACTTCGCCTTGGCACACC    | gDNA |
| BRCA2ex17 Sp off1F  | BRCA2 OT | exon 17 Sp OT1                | cacgcccctgtaatcccacta     | gDNA |
| BRCA2ex17 Sp off1R  | BRCA2 OT | exon 17 Sp OT1                | GTGGTCTTCTTCCACCTCCTC     | gDNA |
| BRCA2ex17 Sp off2F  | BRCA2 OT | exon 17 Sp OT2                | gaaatcacgccaactgcattcca   | gDNA |
| BRCA2ex17 Sp off2R  | BRCA2 OT | exon 17 Sp OT2                | gattcaccacttttcccagcg     | gDNA |
| BRCA2ex17 Sp off3F  | BRCA2 OT | exon 17 Sp OT3<br>and KKH OT4 | tgcaaattcacagcaaagcagga   | gDNA |
| BRCA2ex17 Sp off3R  | BRCA2 OT | exon 17 Sp OT3                | ACATTGACCCAGTTGCTCTCT     | gDNA |
| BRCA2ex17 Sp off4F  | BRCA2 OT | exon 17 Sp OT4                | TGCTGCTACTCTTTTCTGGACACT  | gDNA |
| BRCA2ex17 Sp off4R  | BRCA2 OT | exon 17 Sp OT4                | GGAGCAATTCACCTGATGCATCTC  | gDNA |
| BRCA2ex17 KKH off1F | BRCA2 OT | exon 17 KKH OT1               | gcactcccactgccTGTATTGA    | gDNA |
| BRCA2ex17 KKH off1R | BRCA2 OT | exon 17 KKH OT1               | GAGTAGGGGAAAAGAGGGGAGC    | gDNA |
| BRCA2ex17 KKH off2F | BRCA2 OT | exon 17 KKH OT2               | TCAGAGACTCCAATGATGCCATGtt | gDNA |
| BRCA2ex17 KKH off2R | BRCA2 OT | exon 17 KKH OT2               | gctatgttgcctggctagagtgt   | gDNA |
| BRCA2ex17 KKH off3F | BRCA2 OT | exon 17 KKH OT3               | GGGTGGTAGACAAGAAGCCTCA    | gDNA |
| BRCA2ex17 KKH off3R | BRCA2 OT | exon 17 KKH OT3               | GGCACAGACAGACCACAAAAGG    | gDNA |

|                       |           |                                 |                           |      |
|-----------------------|-----------|---------------------------------|---------------------------|------|
| BRCA2ex26off1F        | BRCA2 OT  | exon 26 OT1                     | AAGCCACGTTAGCATTTCCTTC    | gDNA |
| BRCA2ex26off1R        | BRCA2 OT  | exon 26 OT1                     | aggcacttaatcttagagatgggct | gDNA |
| BRCA2ex26off2F        | BRCA2 OT  | exon 26 OT2                     | tcagagatatgtcccctgccct    | gDNA |
| BRCA2ex26off2R        | BRCA2 OT  | exon 26 OT2                     | tgctttgaggatgcctttgctg    | gDNA |
| BRCA2ex26off3F        | BRCA2 OT  | exon 26 OT3                     | TTCTGCATCAGAGCTGTAAGAGGT  | gDNA |
| BRCA2ex26off3R        | BRCA2 OT  | exon 26 OT3                     | CACCAGTAGCTACAAAAAGCAGGA  | gDNA |
| BRCA2ex26off4F        | BRCA2 OT  | exon 26 OT4                     | CAGTGGGTGGTATGGGTCTTT     | gDNA |
| BRCA2ex26off4R        | BRCA2 OT  | exon 26 OT4                     | GGTGAATGGGGTTGCAAGGATG    | gDNA |
| CCNB1ex5off1F         | CCNB1 OT  | exon 5 OT1                      | TGGGACCGGGTTAGAAATCAC     | gDNA |
| CCNB1ex5off1R         | CCNB1 OT  | exon 5 OT1                      | TAAGCAAACAGGGAGCTGAGCT    | gDNA |
| CCNB1ex5off2F         | CCNB1 OT  | exon 5 OT2                      | CAGAACAGACGCTGGTAACACAATT | gDNA |
| CCNB1ex5off2R         | CCNB1 OT  | exon 5 OT2                      | GCAGATAAATTTAATGCTCAGCCGC | gDNA |
| CCNB1ex5off3F         | CCNB1 OT  | exon 5 OT3                      | GAGTCAAAGCCAATCGTCGCAA    | gDNA |
| CCNB1ex5off3R         | CCNB1 OT  | exon 5 OT3                      | TGTGGTTACTGTAGGCAAGGCA    | gDNA |
| CCNB1ex5off4F         | CCNB1 OT  | exon 5 OT4                      | TGCCATTCCCTAAACAACAGTTG   | gDNA |
| CCNB1ex5off4R         | CCNB1 OT  | exon 5 OT4                      | ggaggtgctgtaggaacccat     | gDNA |
| CCNB1ex6off1F         | CCNB1 OT  | exon 6 OT1                      | acccgcctgtaatcccagttac    | gDNA |
| CCNB1ex6off1R         | CCNB1 OT  | exon 6 OT1                      | CATTTGAGTTTTGCATGCGCGT    | gDNA |
| CCNB1ex6off2F         | CCNB1 OT  | exon 6 OT2                      | ACTGGCCTAGATGTACGTGTCT    | gDNA |
| CCNB1ex6off2R         | CCNB1 OT  | exon 6 OT2                      | atgctctactgCCTTGCTGTCA    | gDNA |
| CCNB1ex6off3F         | CCNB1 OT  | exon 6 OT3                      | ACAAGAAAGCTGTACTGGCCCT    | gDNA |
| CCNB1ex6off3R         | CCNB1 OT  | exon 6 OT3                      | TTTGTGCAAGGATGAGAGGGGA    | gDNA |
| CCNB1ex6off4F         | CCNB1 OT  | exon 6 OT4                      | cttcactgctggagggaaatgga   | gDNA |
| CCNB1ex6off4R         | CCNB1 OT  | exon 6 OT4                      | tggcctccgggtttattcatgt    | gDNA |
| EGFRex23off1F         | EGFR OT   | exon 23 OT1                     | ttgatcacgccactgcattcc     | gDNA |
| EGFRex23off1R         | EGFR OT   | exon 23 OT1                     | ttagctggatatggtggtgggc    | gDNA |
| EGFRex23off2F         | EGFR OT   | exon 23 OT2                     | AGGAGGATGCTGGAGTGAGAGA    | gDNA |
| EGFRex23off2R         | EGFR OT   | exon 23 OT2                     | Aaggccccatgaatctgcattct   | gDNA |
| EGFRex23off3F         | EGFR OT   | exon 23 OT3                     | ACTTTAGTCTGCGCCAGAGGAG    | gDNA |
| EGFRex23off3R         | EGFR OT   | exon 23 OT3                     | CGGCGTCAGGTAACAACAGGTTTC  | gDNA |
| EGFRex23off4F         | EGFR OT   | exon 23 OT4                     | ccttgggccccttctGTAATCCA   | gDNA |
| EGFRex23off4R         | EGFR OT   | exon 23 OT4                     | CAACCCAGATGGCTCCACTACA    | gDNA |
| IL1RAPex10 Sp off1F   | IL1RAP OT | exon 10 Sp and<br>VQR OT1       | ccagtgaggcctctgaagagag    | gDNA |
| IL1RAPex10 Sp off1R   | IL1RAP OT | exon 10 Sp and                  | tcagttagttcaagaccagcccg   | gDNA |
| IL1RAPex10 Sp off2F   | IL1RAP OT | exon 10 Sp OT2                  | ATCTGGGTTGCCACAGAAGTCT    | gDNA |
| IL1RAPex10 Sp off2R   | IL1RAP OT | exon 10 Sp OT2                  | TGGGCTGGTTAGGTAGAGGAGT    | gDNA |
| IL1RAPex10 Sp off3,4F | IL1RAP OT | exon 10 Sp and<br>VQR OT3 and 4 | TCAACTCGAGTCCAATTCCTCC    | gDNA |
| IL1RAPex10 Sp off3,4R | IL1RAP OT | exon 10 Sp and                  | AGAAGGGCTTTTCAGGAGAGGG    | gDNA |
| IL1RAPex10 VQR off2F  | IL1RAP OT | exon 10 VQR OT2                 | tttagtagagacggggttcaccg   | gDNA |
| IL1RAPex10 VQR off2R  | IL1RAP OT | exon 10 VQR OT2                 | TGATGGGGCACTGAAGTCAAT     | gDNA |
| JAG1ex9off1F          | JAG1 OT   | exon 9 OT1                      | TGACTAGAAGGGTGGCAATGCA    | gDNA |
| JAG1ex9off1R          | JAG1 OT   | exon 9 OT1                      | CGGCCTTTTACGTTTAAAGCCGT   | gDNA |
| JAG1ex9off2F          | JAG1 OT   | exon 9 OT2                      | CTCTTCCTCCCCAGCTTGCTCTC   | gDNA |
| JAG1ex9off2R          | JAG1 OT   | exon 9 OT2                      | AGTACAGAAAGCGGCCCTTAGG    | gDNA |
| JAG1ex9off3F          | JAG1 OT   | exon 9 OT3                      | aggaggggtggatcatctgaggt   | gDNA |
| JAG1ex9off3R          | JAG1 OT   | exon 9 OT3                      | TTAAGCCCTGTGAGCCACCTTT    | gDNA |

|                |           |             |                          |      |
|----------------|-----------|-------------|--------------------------|------|
| JAG1ex9off4F   | JAG1 OT   | exon 9 OT4  | TGTATGTGAATGAGCGGGTGGT   | gDNA |
| JAG1ex9off4R   | JAG1 OT   | exon 9 OT4  | AGCATGGCTTGATTCCTGACT    | gDNA |
| JAG1ex12off1F  | JAG1 OT   | exon 12 OT1 | AGTACTGCAGtctggcccaaat   | gDNA |
| JAG1ex12off1R  | JAG1 OT   | exon 12 OT1 | AAGTCAAGCTGTGCTCAGGGAT   | gDNA |
| JAG1ex12off2F  | JAG1 OT   | exon 12 OT2 | aggagaaaaattcttgggcagca  | gDNA |
| JAG1ex12off2R  | JAG1 OT   | exon 12 OT2 | cctgactctcctgaagacctgc   | gDNA |
| JAG1ex12off3F  | JAG1 OT   | exon 12 OT3 | TGTGTAGCTTGCAAAGACAGCA   | gDNA |
| JAG1ex12off3R  | JAG1 OT   | exon 12 OT3 | CCCAATTTCCCAATGGCTGCTT   | gDNA |
| JAG1ex12off4F  | JAG1 OT   | exon 12 OT4 | ttcgagcaattctcctgcctca   | gDNA |
| JAG1ex12off4R  | JAG1 OT   | exon 12 OT4 | GTTCCTGCTTCCCGTCACTTG    | gDNA |
| LMNAex11off1F  | LMNA OT   | exon 11 OT1 | tggatccagcagctcaatgaca   | gDNA |
| LMNAex11off1R  | LMNA OT   | exon 11 OT1 | ATACCGGCTGTGTGCTTAGTGT   | gDNA |
| LMNAex11off2F  | LMNA OT   | exon 11 OT2 | GACCTGTGTATTGCCCTCT      | gDNA |
| LMNAex11off2R  | LMNA OT   | exon 11 OT2 | CGTGACAGTCTCAGGGACCAAT   | gDNA |
| LMNAex11off3F  | LMNA OT   | exon 11 OT3 | TAAGGCACTGTGCTGAGAGCTC   | gDNA |
| LMNAex11off3R  | LMNA OT   | exon 11 OT3 | CAGAACAAAGCAGCTGATGGCA   | gDNA |
| LMNAex11off4F  | LMNA OT   | exon 11 OT4 | gtcccttgccctaaCACCTCAGT  | gDNA |
| LMNAex11off4R  | LMNA OT   | exon 11 OT4 | GCCTTGAACAGAGGATGGGAT    | gDNA |
| PI4KAex9off1F  | PI4KA OT  | exon 9 OT1  | gaagttcaagaccagcatggcc   | gDNA |
| PI4KAex9off1R  | PI4KA OT  | exon 9 OT1  | AGGGCGAGGTTTGCTACTGAAT   | gDNA |
| PI4KAex9off2F  | PI4KA OT  | exon 9 OT2  | GAAACACCATGGAACGTGCACCT  | gDNA |
| PI4KAex9off2R  | PI4KA OT  | exon 9 OT2  | TATACGACCACAGGTTCTGGCC   | gDNA |
| PI4KAex9off3F  | PI4KA OT  | exon 9 OT3  | CAGGCCTTCTTGACTGGAGGAA   | gDNA |
| PI4KAex9off3R  | PI4KA OT  | exon 9 OT3  | GTGAGGGGAATGGAGCAGTAGT   | gDNA |
| PI4KAex9off4F  | PI4KA OT  | exon 9 OT4  | cagaggttgcggttaagtggaga  | gDNA |
| PI4KAex9off4R  | PI4KA OT  | exon 9 OT4  | ATCCCTGTGTGTCTCCAAGGTC   | gDNA |
| PIK3CAex5off1F | PIK3CA OT | exon 5 OT1  | AGGGCTAGTGTGTCTGAGGACTT  | gDNA |
| PIK3CAex5off1R | PIK3CA OT | exon 5 OT1  | TATGAGTGGTCACTGGGCAGAG   | gDNA |
| PIK3CAex5off2F | PIK3CA OT | exon 5 OT2  | ttgcccaggttaagatttccag   | gDNA |
| PIK3CAex5off2R | PIK3CA OT | exon 5 OT2  | tgcgggttaggggaaaatgttct  | gDNA |
| PIK3CAex5off3F | PIK3CA OT | exon 5 OT3  | CATGCCCTGTCTCCAGCTCTTA   | gDNA |
| PIK3CAex5off3R | PIK3CA OT | exon 5 OT3  | cctcaaaccatcctcccacctt   | gDNA |
| PIK3CAex5off4F | PIK3CA OT | exon 5 OT4  | ACGTGTATCCATGTCTGTAGCCT  | gDNA |
| PIK3CAex5off4R | PIK3CA OT | exon 5 OT4  | GGTTGATCTCATGTGCCTTGCTT  | gDNA |
| RELAex6off1F   | RELA OT   | exon 6 OT1  | catagcccaggaacacaggtca   | gDNA |
| RELAex6off1R   | RELA OT   | exon 6 OT1  | tgcagctgaaggttaagagaggt  | gDNA |
| RELAex6off2F   | RELA OT   | exon 6 OT2  | AACTCAGGCTCTCAGCTTCAGG   | gDNA |
| RELAex6off2R   | RELA OT   | exon 6 OT2  | gtgctatggtttcctggtgcac   | gDNA |
| RELAex6off3F   | RELA OT   | exon 6 OT3  | GGCCTGACCCCTTGCTTTCATC   | gDNA |
| RELAex6off3R   | RELA OT   | exon 6 OT3  | GTCTGCTCTGGTTTGGCTTCC    | gDNA |
| RELAex6off4F   | RELA OT   | exon 6 OT4  | AAGTATATTGAGCGGCCCTCC    | gDNA |
| RELAex6off4R   | RELA OT   | exon 6 OT4  | CTGTTGGATGCAAGGACAGCTG   | gDNA |
| RELAex7off1F   | RELA OT   | exon 7 OT1  | tgagtgaacAAAGTGGGATTCTG  | gDNA |
| RELAex7off1R   | RELA OT   | exon 7 OT1  | tgacagctgccactcattatctgt | gDNA |
| RELAex7off2F   | RELA OT   | exon 7 OT2  | GGCACCACAGTACAAATCAGGTG  | gDNA |
| RELAex7off2R   | RELA OT   | exon 7 OT2  | CTTGCTCATGAAAGGCTCTGAGC  | gDNA |
| RELAex7off3F   | RELA OT   | exon 7 OT3  | TGTAATCTCCACCCCTTCTGCAG  | gDNA |
| RELAex7off3R   | RELA OT   | exon 7 OT3  | TTACCACCTCATGACACATG     | gDNA |

|                |           |             |                          |      |
|----------------|-----------|-------------|--------------------------|------|
| RELAex7off4F   | RELA OT   | exon 7 OT4  | CCATCTGTGACAGAGCCTTGA    | gDNA |
| RELAex7off4R   | RELA OT   | exon 7 OT4  | CTGGGAGGGGTGGAGCTTAAA    | gDNA |
| RELAex10off1F  | RELA OT   | exon 10 OT1 | CCACTTCTCTACCCACTCAGCC   | gDNA |
| RELAex10off1R  | RELA OT   | exon 10 OT1 | atggtggcttggatccttgggtga | gDNA |
| RELAex10off2F  | RELA OT   | exon 10 OT2 | tgttctcacagagtggagagcg   | gDNA |
| RELAex10off2R  | RELA OT   | exon 10 OT2 | CCGAGAAATGCAGACCCAGGTA   | gDNA |
| RELAex10off3F  | RELA OT   | exon 10 OT3 | ctgcggtctctctgtcttcaca   | gDNA |
| RELAex10off3R  | RELA OT   | exon 10 OT3 | CCTGCGTGAATTCATAGACGCC   | gDNA |
| RELAex10off4F  | RELA OT   | exon 10 OT4 | agacaggttctcgctctgtcac   | gDNA |
| RELAex10off4R  | RELA OT   | exon 10 OT4 | AATTGCAAGCCGTCAGTGAAGG   | gDNA |
| SCARB1ex5off1F | SCARB1 OT | exon 5 OT1  | atctggtgtgaatggggaaggg   | gDNA |
| SCARB1ex5off1R | SCARB1 OT | exon 5 OT1  | ATACCCACACCTGACCCACAtg   | gDNA |
| SCARB1ex5off2F | SCARB1 OT | exon 5 OT2  | GACACCATCCTCAACGCCATTG   | gDNA |
| SCARB1ex5off2R | SCARB1 OT | exon 5 OT2  | CAGCCACCAAAGTATCGGGAGA   | gDNA |
| SCARB1ex5off3F | SCARB1 OT | exon 5 OT3  | ACCTGCAGCTACCGAGAAACTT   | gDNA |
| SCARB1ex5off3R | SCARB1 OT | exon 5 OT3  | tctcaaacagacagcgggcata   | gDNA |
| SCARB1ex5off4F | SCARB1 OT | exon 5 OT4  | aatcatccccatccccatcc     | gDNA |
| SCARB1ex5off4R | SCARB1 OT | exon 5 OT4  | aactcccattccctccttctgc   | gDNA |

**Table S2.** Nucleotide sequences of primers used for all PCRs.
