# Supplementary material for: CRISPR-SKIP: programmable gene splicing with single base editors
Source: PubMed Central journal article supplement (PMC6092781; doi:10.1186/s13059-018-1482-5), 2018-08-15
Supplement: 13059_2018_1482_MOESM2_ESM.pdf [file 13059_2018_1482_MOESM2_ESM.pdf]

| RELA EXON 7 |   | INTRON 6 |       |       |       |       |       |       |       |       |       |       |       |       |       |       |       |       |       |       |       | SPICE ACCEPTOR |       |       | EXON 7 |       |       |       |   |   |
|-------------|---|----------|-------|-------|-------|-------|-------|-------|-------|-------|-------|-------|-------|-------|-------|-------|-------|-------|-------|-------|-------|----------------|-------|-------|--------|-------|-------|-------|---|---|
|             |   | PAM      |       |       | T     | T     | G     | T     | T     | T     | T     | C     | A     | C     | T     | G     | C     | T     | C     | A     | G     | C              | A     | G     | G      | T     | G     | C     | C | C |
| WT          | A | 0.03     | 0.04  | 0.16  | 0.03  | 0.01  | 0.10  | 0.02  | 0.08  | 0.03  | 0.09  | 0.05  | 99.41 | 0.02  | 0.05  | 0.14  | 0.03  | 0.11  | 0.08  | 0.02  | 99.62 | 0.11           | 0.12  | 0.03  | 0.19   | 0.05  | 0.16  | 0.10  |   |   |
|             | C | 99.84    | 99.87 | 99.77 | 0.27  | 0.22  | 0.01  | 0.32  | 0.38  | 0.45  | 0.29  | 99.88 | 0.10  | 99.88 | 0.30  | 0.02  | 99.85 | 99.79 | 0.41  | 99.88 | 0.08  | 0.03           | 0.04  | 0.31  | 0.05   | 99.79 | 99.85 | 99.87 |   |   |
|             | G | 0.02     | 0.01  | 0.01  | 0.05  | 0.03  | 99.77 | 0.09  | 0.04  | 0.02  | 0.08  | 0.01  | 0.35  | 0.01  | 0.06  | 99.73 | 0.01  | 0.01  | 0.04  | 0.02  | 0.28  | 99.73          | 99.82 | 0.08  | 99.71  | 0.02  | 0.05  | 0.07  |   |   |
| SP-BE3      | A | 0.02     | 0.09  | 0.25  | 0.04  | 0.04  | 0.20  | 0.02  | 0.08  | 0.04  | 0.16  | 0.06  | 99.13 | 0.02  | 0.05  | 0.39  | 0.05  | 0.13  | 0.11  | 0.03  | 99.59 | 6.26           | 0.65  | 0.06  | 0.18   | 0.05  | 0.35  | 0.22  |   |   |
|             | C | 99.81    | 99.77 | 99.86 | 0.28  | 0.29  | 0.03  | 0.33  | 0.38  | 0.38  | 0.37  | 99.84 | 0.16  | 99.87 | 0.32  | 0.03  | 99.83 | 99.75 | 0.35  | 99.87 | 0.07  | 0.59           | 0.07  | 0.26  | 0.08   | 99.71 | 99.41 | 99.48 |   |   |
|             | G | 0.04     | 0.03  | 0.03  | 0.08  | 0.04  | 99.58 | 0.10  | 0.07  | 0.06  | 0.14  | 0.03  | 0.49  | 0.02  | 0.11  | 99.43 | 0.02  | 0.02  | 0.08  | 0.02  | 0.30  | 93.00          | 99.23 | 0.06  | 99.70  | 0.05  | 0.10  | 0.11  |   |   |
|             |   | 0.13     | 0.11  | 0.07  | 99.80 | 99.64 | 0.18  | 99.54 | 99.52 | 99.52 | 99.33 | 0.07  | 0.22  | 0.09  | 99.53 | 0.16  | 0.11  | 0.10  | 99.46 | 0.08  | 0.04  | 0.24           | 0.05  | 99.62 | 0.08   | 0.20  | 0.14  | 0.18  |   |   |

  

| PIK3CA EXON 5 |   | INTRON 4 |       |       |       |       |       |       |       |       |       |       |       |       |       |       |       |       |       | SPICE ACCEPTOR |       |       | EXON 5 |       |       |       |       |       |
|---------------|---|----------|-------|-------|-------|-------|-------|-------|-------|-------|-------|-------|-------|-------|-------|-------|-------|-------|-------|----------------|-------|-------|--------|-------|-------|-------|-------|-------|
|               |   | PAM      |       |       | C     | C     | T     | T     | A     | A     | T     | C     | T     | C     | T     | A     | A     | T     | A     | C              | A     | G     | T      | A     | T     | A     | T     | A     |
| WT            | A | 0.16     | 0.15  | 0.20  | 0.20  | 0.09  | 0.07  | 0.09  | 99.86 | 99.70 | 0.18  | 0.03  | 0.13  | 0.09  | 0.15  | 0.01  | 99.34 | 0.12  | 99.30 | 0.24           | 0.02  | 99.64 | 0.04   | 99.68 | 0.05  | 99.70 | 99.51 | 0.03  |
|               | C | 99.53    | 99.66 | 99.57 | 99.64 | 99.83 | 0.30  | 0.19  | 0.03  | 0.03  | 0.42  | 99.92 | 0.35  | 99.88 | 0.38  | 0.18  | 0.08  | 99.77 | 0.07  | 0.05           | 0.19  | 0.06  | 0.16   | 0.04  | 0.20  | 0.07  | 0.09  | 0.01  |
|               | G | 0.12     | 0.05  | 0.06  | 0.06  | 0.02  | 0.21  | 0.06  | 0.09  | 0.25  | 0.24  | 0.00  | 0.10  | 0.00  | 0.00  | 0.07  | 0.27  | 0.02  | 0.47  | 99.56          | 0.04  | 0.21  | 0.12   | 0.20  | 0.08  | 0.16  | 0.33  | 99.86 |
| SP-BE3        | A | 0.12     | 0.07  | 0.31  | 0.43  | 0.06  | 0.08  | 0.04  | 99.45 | 99.70 | 0.10  | 0.06  | 0.06  | 0.04  | 0.11  | 0.01  | 99.39 | 0.08  | 99.39 | 26.38          | 0.03  | 99.61 | 0.02   | 99.68 | 0.12  | 99.65 | 99.49 | 10.34 |
|               | C | 99.70    | 99.73 | 99.50 | 99.43 | 99.53 | 0.27  | 0.20  | 0.02  | 0.02  | 0.33  | 99.47 | 0.36  | 99.74 | 0.41  | 0.12  | 0.06  | 99.66 | 0.05  | 14.88          | 0.22  | 0.04  | 0.21   | 0.05  | 0.16  | 0.05  | 0.03  | 0.99  |
|               | G | 0.05     | 0.08  | 0.05  | 0.05  | 0.01  | 0.15  | 0.05  | 0.48  | 0.25  | 0.19  | 0.42  | 0.05  | 0.08  | 0.08  | 0.13  | 0.39  | 96.38 | 0.16  | 0.25           | 0.08  | 0.21  | 0.04   | 0.18  | 0.27  | 87.92 |       |       |
|               |   | 0.12     | 0.13  | 0.14  | 0.09  | 0.40  | 99.49 | 99.71 | 0.06  | 0.03  | 99.37 | 0.05  | 99.52 | 0.15  | 99.41 | 99.76 | 0.19  | 0.12  | 0.16  | 2.58           | 99.59 | 0.11  | 99.69  | 0.06  | 99.67 | 0.12  | 0.22  | 0.75  |

**Figure S1.** Expanded view of NGS analysis shown in **Fig. 2D**. Orange box: PAM sequence. Light blue: Reference sequence shown in sense orientation for clarity. Gray box: sgRNA target sequence. Deep sequencing performed on biological duplicates and averaged.

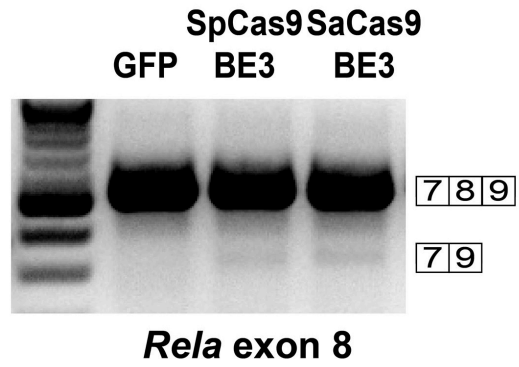

**Figure S2.** Neuro2A cells were transfected with either SpCas9 or SaCas9-KKH C>T base editors targeting the splice acceptor of *Rela* exon 8. Analysis of exon skipping by RT-PCR demonstrated that both base editors effectively induced splicing.

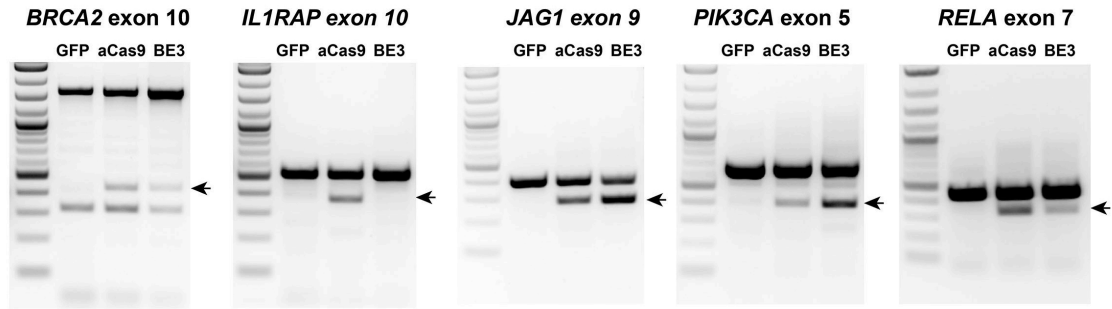

**Figure S3.** Comparison of CRISPR-SKIP and active SpCas9 using the same sgRNAs targeting the splice acceptor of *BRCA2* exon 10, *IL1RAP* exon 10, *JAG1* exon 9, *PIK3CA* exon 5 and *RELA* exon 7.

| BRCA2   |   | INTRON 25 |       |       |       |       |       |       |       |       |       |       |       |       |       |       |       |       |       |       |       | SPICE ACCEPTOR |       |       |       | EXON 26 |       |       |  |  |  |  |  |  |  |  |  |
|---------|---|-----------|-------|-------|-------|-------|-------|-------|-------|-------|-------|-------|-------|-------|-------|-------|-------|-------|-------|-------|-------|----------------|-------|-------|-------|---------|-------|-------|--|--|--|--|--|--|--|--|--|
| EXON 26 |   | PAM       |       |       | A     | C     | T     | T     | T     | T     | T     | T     | T     | C     | T     | T     | A     | G     | A     | A     | T     | A              | T     | T     | G     | A       | C     | A     |  |  |  |  |  |  |  |  |  |
| WT      | A | 0.21      | 0.21  | 0.20  | 98.35 | 0.30  | 0.08  | 0.02  | 99.70 | 0.09  | 0.03  | 0.14  | 0.17  | 0.14  | 0.13  | 0.11  | 99.68 | 0.24  | 99.56 | 99.48 | 0.14  | 99.71          | 0.11  | 0.13  | 0.32  | 99.31   | 0.11  | 99.45 |  |  |  |  |  |  |  |  |  |
|         | C | 0.36      | 99.61 | 99.64 | 0.48  | 99.60 | 0.26  | 0.22  | 0.10  | 0.21  | 0.32  | 0.37  | 0.33  | 99.78 | 0.22  | 0.14  | 0.03  | 0.02  | 0.03  | 0.07  | 0.16  | 0.05           | 0.29  | 0.40  | 0.03  | 0.12    | 99.71 | 0.08  |  |  |  |  |  |  |  |  |  |
|         | G | 0.17      | 0.07  | 0.05  | 0.51  | 0.01  | 0.08  | 0.14  | 0.14  | 0.16  | 0.05  | 0.28  | 0.32  | 0.03  | 0.18  | 0.10  | 0.26  | 99.65 | 0.33  | 0.40  | 0.16  | 0.20           | 0.31  | 0.27  | 99.45 | 0.47    | 0.06  | 0.38  |  |  |  |  |  |  |  |  |  |
| SP-BE3  | A | 99.28     | 0.11  | 0.12  | 0.05  | 0.09  | 99.57 | 99.62 | 0.05  | 99.54 | 99.60 | 99.21 | 99.18 | 0.05  | 99.47 | 99.65 | 0.03  | 0.09  | 0.07  | 0.05  | 99.54 | 0.03           | 99.34 | 99.20 | 0.21  | 0.09    | 0.11  | 0.10  |  |  |  |  |  |  |  |  |  |
|         | C | 0.37      | 99.81 | 99.77 | 0.24  | 99.77 | 0.29  | 0.17  | 0.04  | 0.19  | 0.31  | 0.33  | 0.32  | 99.88 | 0.22  | 0.12  | 0.01  | 0.16  | 0.03  | 0.02  | 0.16  | 0.01           | 0.27  | 0.34  | 0.02  | 0.08    | 99.84 | 0.03  |  |  |  |  |  |  |  |  |  |
|         | G | 0.07      | 0.03  | 0.02  | 0.37  | 0.01  | 0.05  | 0.06  | 0.09  | 0.09  | 0.03  | 0.14  | 0.13  | 0.02  | 0.11  | 0.06  | 0.18  | 98.86 | 0.31  | 0.32  | 0.06  | 0.16           | 0.13  | 0.13  | 99.67 | 0.44    | 0.02  | 0.32  |  |  |  |  |  |  |  |  |  |
| VQR     | A | 0.10      | 0.10  | 0.13  | 99.11 | 0.16  | 0.05  | 0.02  | 99.83 | 0.04  | 0.02  | 0.06  | 0.08  | 0.07  | 0.08  | 0.05  | 99.77 | 98.35 | 99.63 | 99.63 | 0.05  | 99.80          | 0.06  | 0.07  | 0.23  | 99.41   | 0.07  | 99.61 |  |  |  |  |  |  |  |  |  |
|         | C | 0.37      | 99.81 | 99.77 | 0.24  | 99.77 | 0.29  | 0.17  | 0.04  | 0.19  | 0.31  | 0.33  | 0.32  | 99.88 | 0.22  | 0.12  | 0.01  | 0.16  | 0.03  | 0.02  | 0.16  | 0.01           | 0.27  | 0.34  | 0.02  | 0.08    | 99.84 | 0.03  |  |  |  |  |  |  |  |  |  |
|         | G | 0.07      | 0.03  | 0.02  | 0.37  | 0.01  | 0.05  | 0.06  | 0.09  | 0.09  | 0.03  | 0.14  | 0.13  | 0.02  | 0.11  | 0.06  | 0.18  | 98.86 | 0.31  | 0.32  | 0.06  | 0.16           | 0.13  | 0.13  | 99.67 | 0.44    | 0.02  | 0.32  |  |  |  |  |  |  |  |  |  |
|         |   | s]        |       |       | T     | G     | A     | A     | T     | A     | A     | A     | G     | A     | A     | T     | C     | T     | T     | A     | T     | A              | A     | A     | G     | T       | f]    |       |  |  |  |  |  |  |  |  |  |

  

| RELA    |   | INTRON 9 |       |       |       |       |       |       |       |       |       |       |       |       |       |       |       |       |       |       |       | SPICE ACCEPTOR |       |       |       | EXON 10 |       |       |   |   |  |  |  |  |  |  |  |
|---------|---|----------|-------|-------|-------|-------|-------|-------|-------|-------|-------|-------|-------|-------|-------|-------|-------|-------|-------|-------|-------|----------------|-------|-------|-------|---------|-------|-------|---|---|--|--|--|--|--|--|--|
| EXON 10 |   | PAM      |       |       | A     | C     | T     | T     | T     | T     | T     | T     | T     | T     | T     | T     | T     | A     | G     | A     | A     | T              | A     | T     | G     | A       | C     | C     | A | C |  |  |  |  |  |  |  |
| WT      | A | 86.57    | 0.10  | 0.09  | 0.10  | 99.43 | 0.20  | 0.09  | 0.05  | 0.04  | 0.04  | 0.03  | 0.16  | 0.23  | 0.16  | 0.12  | 0.05  | 98.42 | 0.06  | 99.26 | 0.23  | 0.15           | 98.49 | 0.06  | 0.10  | 0.05    | 97.38 | 0.11  |   |   |  |  |  |  |  |  |  |
|         | C | 0.54     | 99.78 | 99.75 | 0.30  | 0.16  | 0.11  | 99.72 | 99.71 | 99.77 | 0.31  | 0.35  | 0.07  | 99.06 | 99.68 | 99.71 | 0.04  | 0.83  | 99.83 | 0.12  | 0.07  | 0.03           | 0.63  | 99.84 | 99.73 | 99.86   | 1.44  | 99.75 |   |   |  |  |  |  |  |  |  |
|         | G | 0.69     | 0.03  | 0.04  | 0.13  | 0.26  | 99.61 | 0.04  | 0.07  | 0.07  | 0.17  | 0.18  | 99.67 | 0.13  | 0.08  | 0.01  | 0.11  | 0.45  | 0.01  | 0.54  | 99.58 | 99.72          | 0.66  | 0.01  | 0.05  | 0.01    | 1.08  | 0.03  |   |   |  |  |  |  |  |  |  |
| SA-BE3  | A | 0.20     | 0.09  | 0.12  | 99.47 | 0.15  | 0.08  | 0.14  | 0.18  | 0.12  | 99.48 | 99.44 | 0.11  | 0.37  | 0.09  | 0.16  | 99.60 | 0.31  | 0.10  | 0.08  | 0.12  | 0.10           | 0.23  | 0.09  | 0.12  | 0.08    | 0.10  | 0.11  |   |   |  |  |  |  |  |  |  |
|         | C | 0.79     | 99.64 | 99.57 | 0.33  | 0.32  | 0.20  | 99.54 | 99.46 | 99.51 | 0.29  | 0.37  | 0.14  | 98.68 | 99.29 | 99.52 | 0.23  | 1.30  | 99.67 | 0.23  | 0.68  | 2.30           | 1.59  | 99.79 | 99.54 | 99.76   | 2.51  | 99.66 |   |   |  |  |  |  |  |  |  |
|         | G | 0.95     | 0.07  | 0.09  | 0.27  | 0.37  | 99.25 | 0.05  | 0.16  | 0.15  | 0.21  | 0.29  | 99.18 | 0.16  | 0.22  | 0.02  | 0.26  | 0.60  | 0.03  | 0.58  | 51.80 | 47.52          | 1.01  | 0.03  | 0.08  | 0.02    | 1.61  | 0.08  |   |   |  |  |  |  |  |  |  |
| KKH     | A | 97.59    | 0.23  | 0.18  | 0.17  | 99.06 | 0.37  | 0.19  | 0.07  | 0.14  | 0.03  | 0.07  | 0.46  | 0.42  | 0.40  | 0.19  | 0.12  | 97.64 | 0.20  | 99.07 | 46.61 | 46.95          | 96.83 | 0.08  | 0.22  | 0.12    | 95.64 | 0.14  |   |   |  |  |  |  |  |  |  |
|         | C | 0.95     | 0.07  | 0.09  | 0.27  | 0.37  | 99.25 | 0.05  | 0.16  | 0.15  | 0.21  | 0.29  | 99.18 | 0.16  | 0.22  | 0.02  | 0.26  | 0.60  | 0.03  | 0.58  | 51.80 | 47.52          | 1.01  | 0.03  | 0.08  | 0.02    | 1.61  | 0.08  |   |   |  |  |  |  |  |  |  |
|         | T | 0.37     | 0.09  | 0.16  | 99.23 | 0.25  | 0.18  | 0.23  | 0.31  | 0.20  | 99.47 | 99.27 | 0.23  | 0.73  | 0.09  | 0.27  | 99.39 | 0.46  | 0.10  | 0.11  | 0.91  | 1.23           | 0.99  | 0.10  | 0.15  | 0.10    | 0.23  | 0.12  |   |   |  |  |  |  |  |  |  |
|         |   | s]       |       |       | G     | G     | G     | A     | A     | C     | G     | G     | G     | A     | T     | G     | T     | C     | C     | T     | G     | G              | G     | T     | f]    |         |       |       |   |   |  |  |  |  |  |  |  |

**Figure S4.** Expanded view of NGS analysis shown in **Fig. 5C** and **5D**. Orange box: PAM sequence. Light blue: Reference sequence shown in sense orientation for clarity. Gray box: sgRNA target sequence. Deep sequencing performed on biological duplicates and averaged.

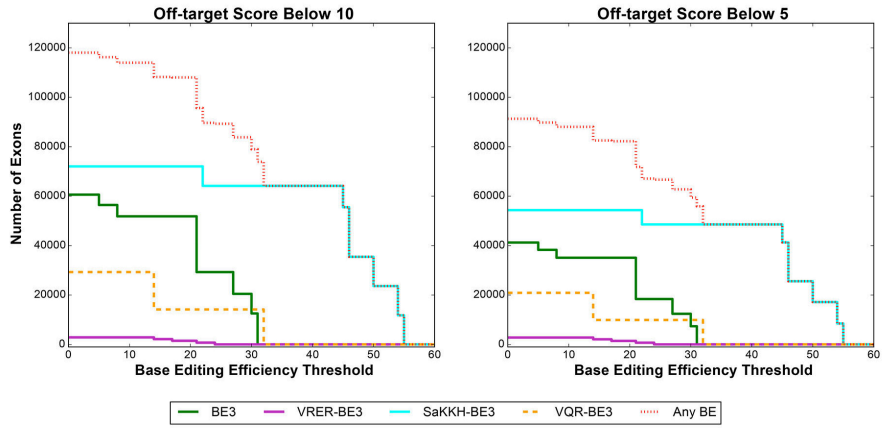

**Figure S5.** Estimation of the number of exons that can be targeted by each base editor with subplots filtered by the maximum allowed off-target score. The y-axis denotes the number of exons that can be targeted with estimated efficiency of modifying intronic flanking G at or above the corresponding value on the x-axis.

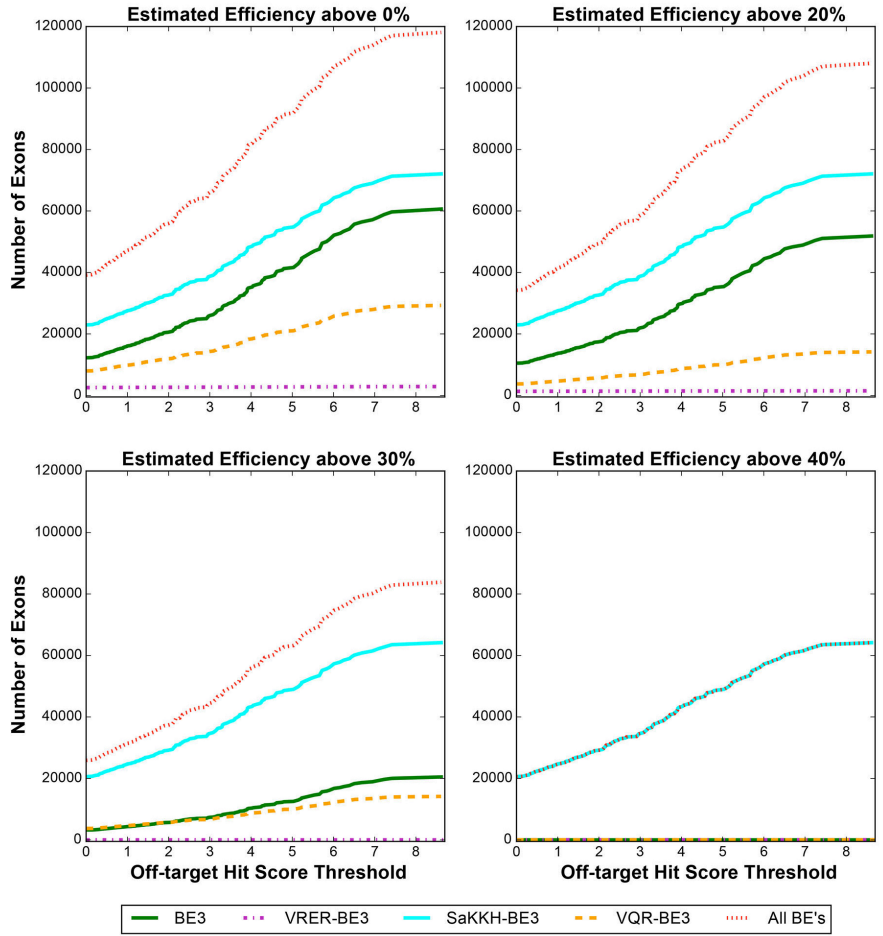

**Figure S6.** Estimation of the number of exons that can be targeted by each base editor with subplots filtered by estimated efficiency of editing the flanking G nucleotide. The y-axis denotes the number of exons that can be targeted with maximum off-target score at or below the corresponding value on the x-axis.

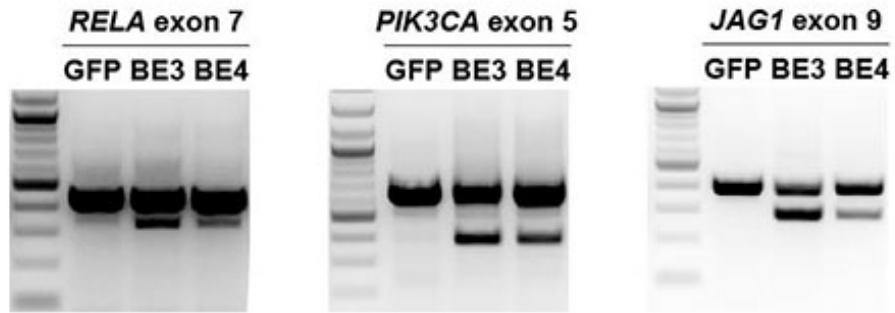

**Figure S7.** Comparison of CRISPR-SKIP using the C>T base editors BE3 or BE4 for inducing skipping of *PIK3CA* exon 5, *RELA* exon 7, and *JAG1* exon 9 by RT-PCR analysis.
